# Supplementary material for: MicroRNA profiling implicates the insulin-like growth factor pathway in bleomycin-induced pulmonary fibrosis in mice
Source: PubMed Central journal article supplement (PMC3766165; doi:10.1186/1755-1536-6-16), 2013-08-29

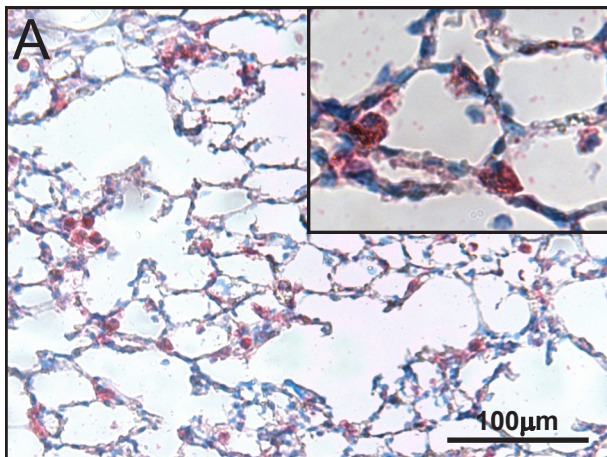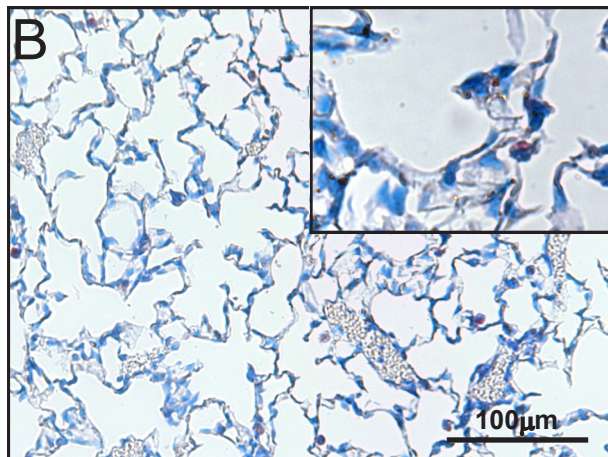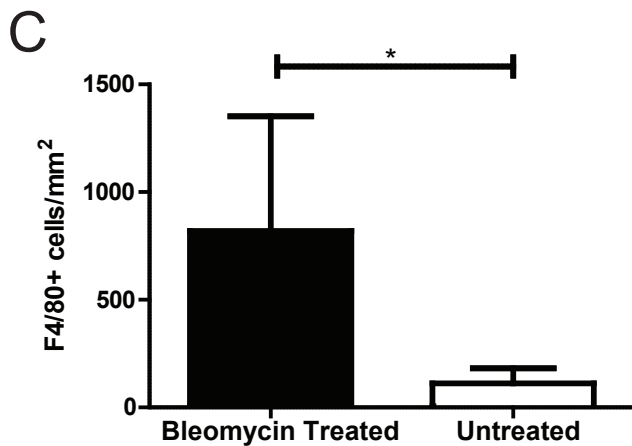

Supplement: 1755-1536-6-16-S1.pdf [file 1755-1536-6-16-S1.pdf]
