# Supplementary material for: MicroRNA profiling implicates the insulin-like growth factor pathway in bleomycin-induced pulmonary fibrosis in mice
Source: PubMed Central journal article supplement (PMC3766165; doi:10.1186/1755-1536-6-16), 2013-08-29
Supplement: 1755-1536-6-16-S2.pdf [file 1755-1536-6-16-S2.pdf]

**Supplementary Table 1:** Pathways significantly represented within differentially expressed genes that were not predicted to be regulated by microRNA.

| Ingenuity Canonical Pathway                                                  | -log (p-value) |
|------------------------------------------------------------------------------|----------------|
| Agranulocyte Adhesion and Diapedesis                                         | 13.80          |
| Granulocyte Adhesion and Diapedesis                                          | 13.60          |
| Hepatic Fibrosis / Hepatic Stellate Cell Activation                          | 10.10          |
| Atherosclerosis Signaling                                                    | 7.40           |
| Leukocyte Extravasation Signaling                                            | 5.12           |
| Inhibition of Matrix Metalloproteases                                        | 4.80           |
| LXR/RXR Activation                                                           | 4.60           |
| Production of Nitric Oxide and Reactive Oxygen Species in Macrophages        | 4.26           |
| Nicotine Degradation II                                                      | 4.09           |
| Complement System                                                            | 4.03           |
| Inhibition of Angiogenesis by TSP1                                           | 3.91           |
| Glutathione-mediated Detoxification                                          | 3.90           |
| RhoA Signaling                                                               | 3.88           |
| Histamine Degradation                                                        | 3.74           |
| Ethanol Degradation IV                                                       | 3.73           |
| IL-8 Signaling                                                               | 3.66           |
| ILK Signaling                                                                | 3.62           |
| LPS/IL-1 Mediated Inhibition of RXR Function                                 | 3.41           |
| IL-10 Signaling                                                              | 3.40           |
| Eicosanoid Signaling                                                         | 3.35           |
| Role of Pattern Recognition Receptors in Recognition of Bacteria and Viruses | 3.19           |
| Oxidative Ethanol Degradation III                                            | 3.16           |
| Intrinsic Prothrombin Activation Pathway                                     | 3.14           |
| Aryl Hydrocarbon Receptor Signaling                                          | 2.85           |
| Colorectal Cancer Metastasis Signaling                                       | 2.80           |
| Bladder Cancer Signaling                                                     | 2.71           |
| Bupropion Degradation                                                        | 2.64           |
| Ethanol Degradation II                                                       | 2.63           |
| Dendritic Cell Maturation                                                    | 2.56           |
| Prostanoid Biosynthesis                                                      | 2.55           |
| Acetone Degradation I (to Methylglyoxal)                                     | 2.54           |
| Nicotine Degradation III                                                     | 2.49           |
| p53 Signaling                                                                | 2.47           |
| Actin Cytoskeleton Signaling                                                 | 2.35           |
| Glycolysis I                                                                 | 2.25           |
| Putrescine Degradation III                                                   | 2.19           |
| Acute Phase Response Signaling                                               | 2.18           |
| 4-1BB Signaling in T Lymphocytes                                             | 2.18           |
| Arginine Degradation VI (Arginase 2 Pathway)                                 | 2.16           |
| Dopamine Degradation                                                         | 2.16           |
| NRF2-mediated Oxidative Stress Response                                      | 2.13           |
| Cardiac $\beta$ -adrenergic Signaling                                        | 2.05           |
| Guanosine Nucleotides Degradation III                                        | 2.03           |
